# Supplementary material
Source: ML conference proceedings conference paper supplement (https://proceedings.mlr.press/v80/dibangoye18a.html)
Supplement: Supplementary file 1 [file dibangoye18a-supp.pdf]

## A. Supplementary Material

### A.1. Proof of Lemma 1

*Proof.* Consider the  $\alpha$ -vector induced when agents follow plan  $a_{t:\ell-1}$  from control interval  $t$  onwards, denoted  $\alpha^{a_{t:\ell-1}}$  and given by  $\alpha^{a_{t:\ell-1}}(x, o) \doteq \mathbb{E}\{R_t | x_t = x, o_t = o, a_{t:\ell-1}\}$ . Hence, the optimal value starting at any occupancy state  $s_t$  is given by taking the maximum over values of all possible plans from control interval  $t$  onwards:  $V_t^*(s_t) = \max_{a_{t:\ell-1}} \langle s_t, \alpha^{a_{t:\ell-1}} \rangle$ . In addition, the linearity of the expectation also implies that  $\alpha^{a_{t:\ell-1}}$  is linear in the occupancy-state space. The proof directly follows from (Rockafellar, 1970, Theorem 5.5).  $\square$

### A.2. Proof of Lemma 2

*Proof.* We proceed by induction to prove this property. In the following we assume that all operations (e.g. integrals) are well-defined in the corresponding spaces. For control interval  $t = \ell - 1$ , we only have to take into account the immediate reward and, thus, we have that  $Q_{\ell-1}^*(s_{\ell-1}, a_{\ell-1}) = R(s_{\ell-1}, a_{\ell-1})$ . Therefore, if we define the set  $\Omega_{\ell-1}^* = \{q_{\ell-1}\}$ , where  $q_{\ell-1}(x, o, u) \doteq r(x, u)$ , the property holds at control interval  $t = \ell - 1$ . We now assume the property holds for control interval  $\tau + 1$  and we show that it also holds for control interval  $\tau$ . Using (2) and (4), we have that,  $Q_\tau^*(s_\tau, a_\tau) = R(s_\tau, a_\tau) + \gamma_1 \max_{a_{\tau+1}} Q_{\tau+1}^*(T(s_\tau, a_\tau), a_{\tau+1})$ , and by the induction hypothesis, let  $s_{\tau+1} \doteq T(s_\tau, a_\tau)$ :

$$Q_{\tau+1}^*(s_{\tau+1}, a_{\tau+1}) = \max_{q \in \Omega_{\tau+1}^*} \sum_{x, o, u} s_\tau(x, o) a_\tau(u | o) \sum_{y, z, u'} p^{u, z}(x, y) a_{\tau+1}(u' | o, u, z) q(y, (o, u, z), u').$$

With the above,

$$Q_\tau^*(s_\tau, a_\tau) = \max_{a \in A_{\tau+1}, q \in \Omega_{\tau+1}^*} \sum_{x, o, u} s_\tau(x, o) a_\tau(u | o) [r(x, u) + \gamma_1 \sum_{y, z, u'} p^{u, z}(x, y) a(u' | o, u, z) q(y, (o, u, z), u')].$$

At this point, we can define the bracketed quantity as

$$q^{a_{\tau+1}}(x, o, u) \doteq r(x, u) + \gamma_1 \sum_{y, z, u'} p^{u, z}(x, y) a_{\tau+1}(u' | o, u, z) q(y, (o, u, z), u').$$

Note that  $\alpha$ -vector  $q^{a_{\tau+1}}$  is independent of occupancy state  $s_\tau$  and decision rule  $a_\tau$  for which we are computing  $Q_\tau^*$ . With this, we have that  $Q_\tau^*(s_\tau, a_\tau) = \max_{q^a : a \in A_{\tau+1}, q \in \Omega_{\tau+1}^*} \langle s_\tau \odot a_\tau, q^a \rangle$  and, thus the lemma holds.  $\square$

### A.3. Proof of Theorem 1

*Proof.* The proof derives directly from Lemma 2. First, notice that any arbitrary non-dominated joint plan  $\rho$  induces a sequence of  $\alpha$ -vectors  $q_{0:\ell-1}^\rho$  stored in  $\Omega_{0:\ell-1}^*$ , which proves the  $Q$ -value function under a fixed plan is linear over occupancy states and joint decision rules. In addition, each  $\alpha$ -vector  $q_t^\rho \in \Omega_t^*$  describes the expected returns from  $t \in \llbracket 0; \ell - 1 \rrbracket$  onward, when agents follow non-dominated joint plan  $\rho$ . If we let  $\rho^*$  be a greedy joint plan with respect to  $Q_{0:\ell-1}^*$ , then  $q_{0:\ell-1}^{\rho^*}$  is maximal along  $\{T(s_0, a_{0:t-1}^*)\}_{t \in \llbracket 0; \ell - 1 \rrbracket}$ .  $\square$
